# Supplementary material for: Nck1, But Not Nck2, Mediates Disturbed Flow‐Induced p21‐Activated Kinase Activation and Endothelial Permeability
Source: PubMed Central journal article supplement — J Am Heart Assoc. 2020 Jun 10;9(11):e016099. doi: 10.1161/JAHA.120.016099 (PMC7428973; doi:10.1161/jaha.120.016099), 2020-06-10

# **SUPPLEMENTAL MATERIAL**

**Figure S1. Deletion of Nck1 and Nck2 adaptor proteins blunt shear stress-induced endothelial permeability.**

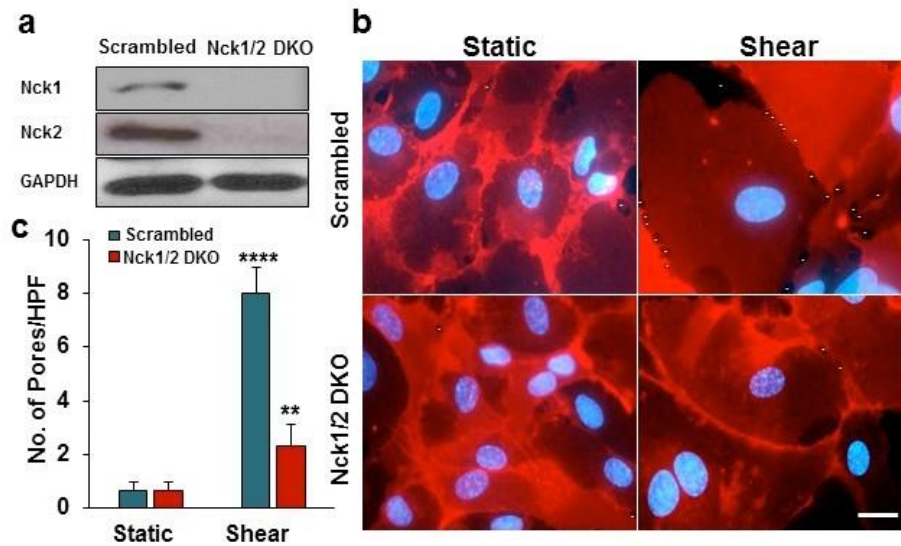

**a)** A representative blot showing deletion of Nck1 and Nck2 in Nck1/2 DKO cells. **b-c)** Endothelial monolayer integrity was assessed in Nck1/2 DKO or Scramble cells after shear stress (30 minutes) and stained with PECAM-1 (Red) for paracellular pore formation (stars). All data are from  $n=4$ , mean  $\pm$  SEM, analyzed by 2-way ANOVA, and Bonferroni's post-test,  $**p<0.01$ .  $****p<0.0001$ . Scale bars=100 $\mu$ m.

**Figure S2. Ablation of Nck1 but not Nck2 adaptor protein blunts shear stress-induced endothelial permeability.**

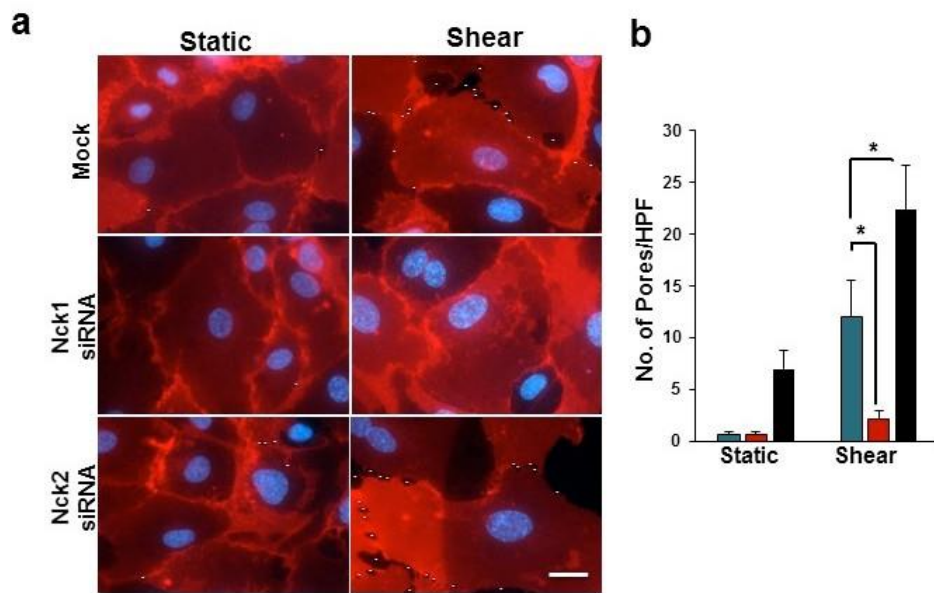

**(a & b)** PECAM-1 stained cells showing paracellular formation (arrows) in Nck1 and Nck2 siRNA treated cells. Images analyzed using Nis Elements software from n=4. Scale bars=200 $\mu$ m. Data are analyzed by 2-Way ANOVA and Bonferroni's post-test, \*p<0.05.

**Figure S3. Conditional Nck1 and Nck2 KO is endothelial specific after tamoxifen injection.**

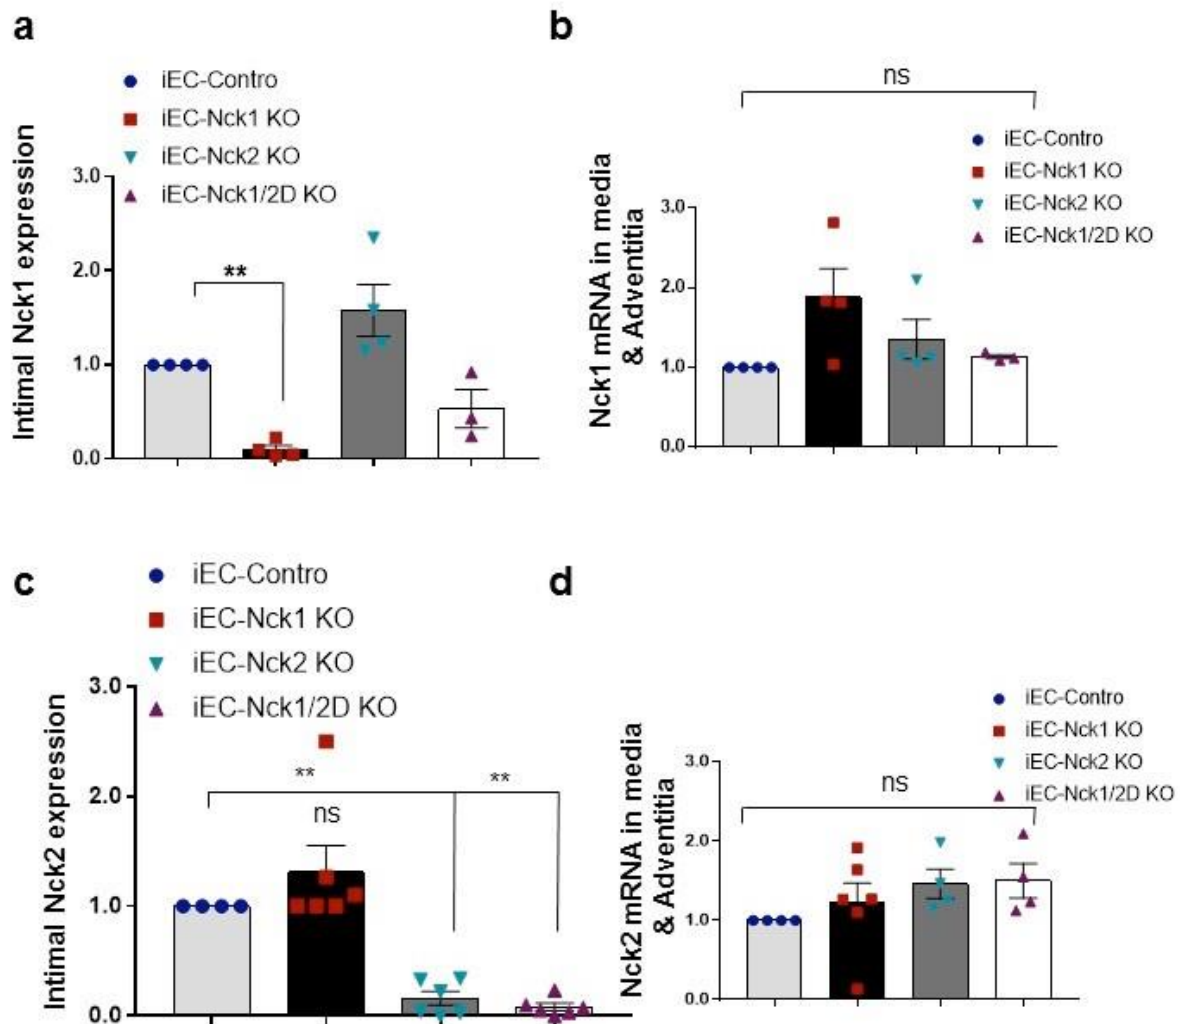

Intimal and medial / adventitial Carotid mRNA analysis from iEC-Control, iEC-Nck1 KO, iEC-Nck2 KO, iEC-Nck1/2 DKO mice after tamoxifen injection and two weeks recovery. a-b) Nck1 mRNA and (c-d) Nck2 mRNA levels are normalized to the house keeping gene RPL13a and are from n=3-6/ group. Data are mean  $\pm$  SEM, analyzed by 1-Way ANOVA and Tukey's post-test, \*\* $p < 0.01$ , ns, indicates non-significance.

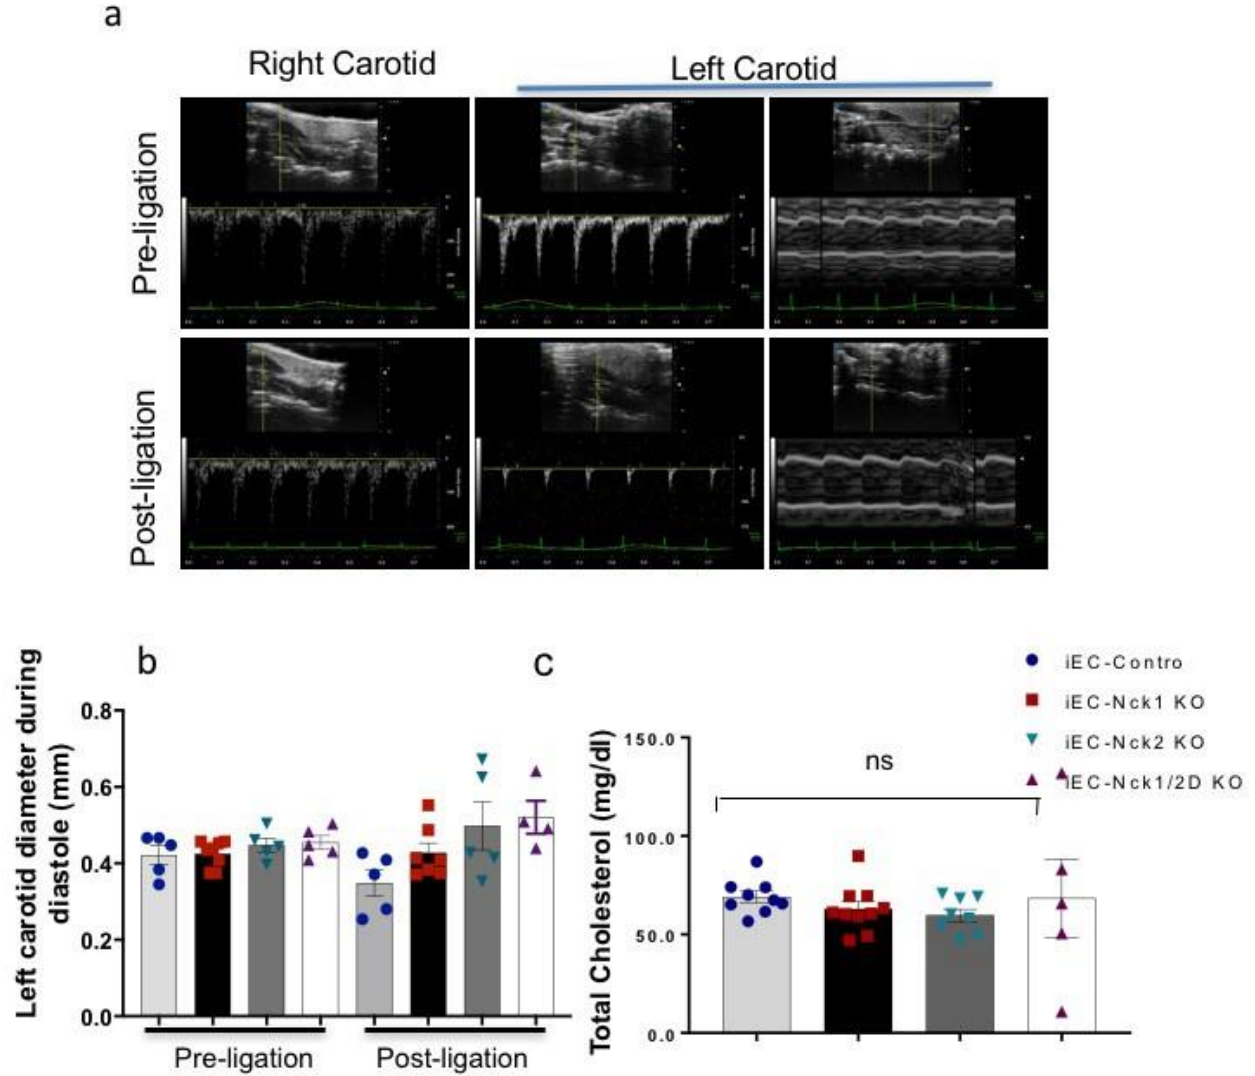

**Figure S4.** a) A representative Doppler carotid echocardiographic images from mice subjected to partial carotid ligation surgery showed a low and oscillatory flow. b) wall dimension changes of left carotid artery before and after ligation among experimental groups. c) Plasma total cholesterol levels showing non-significant (ns) changes among experimental groups. Data are mean  $\pm$  SEM, analyzed by 1-Way ANOVA.

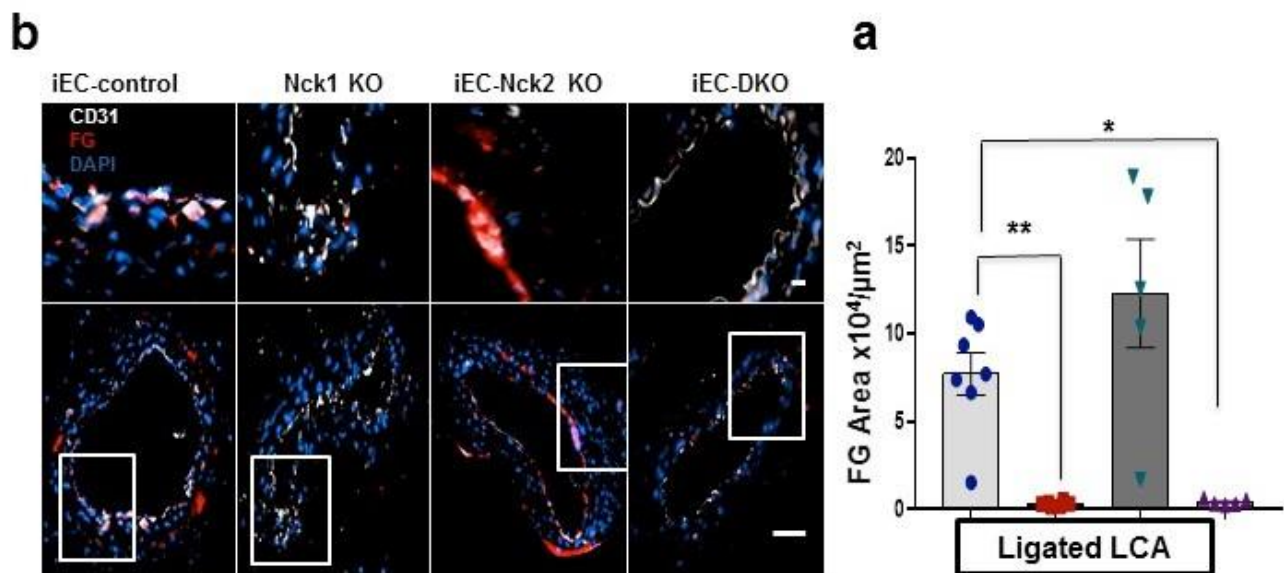

**Figure S5. a-b)** Nck1 KO mice showed significantly less Fibrinogen (FG, red) staining in ligated carotid arteries. Images analyzed using NIS-Elements software, from n=5-7 mice per group. Data are mean  $\pm$  SEM, analyzed by 1-Way ANOVA and Tukey's post-test, \*p<0.05, \*\*p<0.01. Sale bars= 100-200 $\mu$ m.

Figure S6. A representative blot from endothelial cell lysates from either Nck1siRNA treated or untreated cells after oscillatory shear stress ( $\pm 5$  dynes/cm<sup>2</sup> with 1 dyne/cm<sup>2</sup> forward) showing phospho PAK s141, total PAK and Nck1 levels.  $\beta$ -tubulin was used a loading control, from n=3.

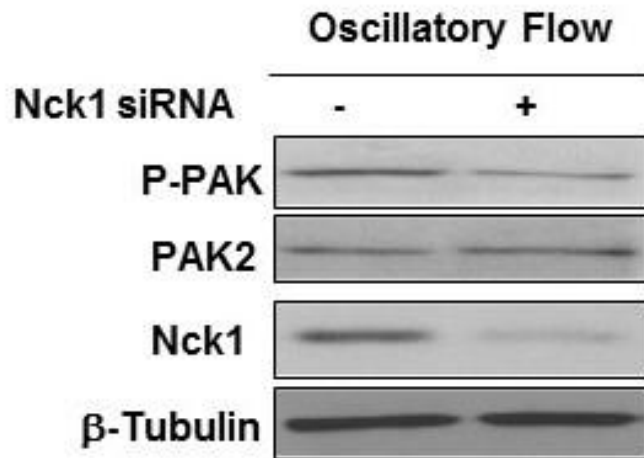

**Figure S7. A representative blot from Nck1 co-immunoprecipitations after being treated with or without AX-024 (50nM) and the cells were subjected to shear stress for 30minutes, showing phospho PAK s141, and Nck1 levels, from n=3.**

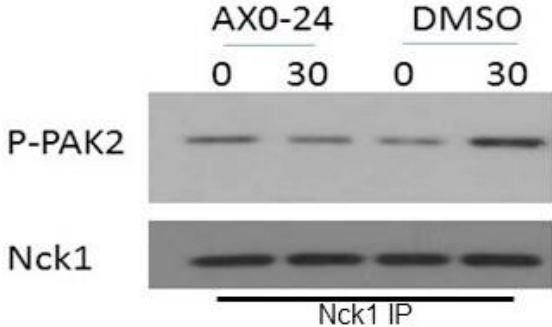

Supplement: JAH3-9-e016099-s001.pdf [file JAH3-9-e016099-s001.pdf]
